# Supplementary material for: Hemopexin and α1-microglobulin heme scavengers with differential involvement in preeclampsia and fetal growth restriction
Source: PubMed Central journal article supplement (PMC7485876; doi:10.1371/journal.pone.0239030), 2020-09-11

# **Hemopexin and $\alpha_1$ -microglobulin heme scavengers with differential involvement in preeclampsia and fetal growth restriction**

Lina Youssef<sup>1,2\*</sup>, Lena Erlandsson<sup>1</sup>, Bo Åkerström<sup>3</sup>, Jezid Miranda<sup>2</sup>, Cristina Paules<sup>2</sup>,  
Francesca Crovetto<sup>2,4</sup>, Fatima Crispi<sup>2,4</sup>, Eduard Gratacos<sup>2,4</sup>, Stefan R. Hansson<sup>1,5</sup>.

<sup>1</sup> Section of Obstetrics and Gynecology, Department of Clinical Sciences Lund, Lund University, Sweden.

<sup>2</sup> BCNatal | Fetal Medicine Research Center (Hospital Clínic and Hospital Sant Joan de Déu), Institut d'Investigacions Biomèdiques August Pi i Sunyer (IDIBAPS), University of Barcelona, Barcelona, Spain.

<sup>3</sup> Section of infection Medicine, Department of Clinical Sciences, Lund University, Lund, Sweden.

<sup>4</sup> Centre for Biomedical Research on Rare Diseases (CIBER-ER), Madrid, Spain.

<sup>5</sup> Skåne University Hospital, Lund/Malmö, Sweden.

*\*Corresponding author:*

E-mail: [lyoussef@clinic.cat](mailto:lyoussef@clinic.cat)

[linayoussefdr@gmail.com](mailto:linayoussefdr@gmail.com)

**S1 Table. Concentrations of heme scavengers in maternal and fetal blood in the study population.**

|                                      | <b>Controls</b> | <b>FGR</b>    | <b>PE</b>     | <b>PE&amp;FGR</b> |
|--------------------------------------|-----------------|---------------|---------------|-------------------|
| <i>Maternal blood concentrations</i> |                 |               |               |                   |
| Number of samples                    | 49              | 47            | 45            | 51                |
| Hemopexin (ug/ml)                    | 1094 (±256)     | 1048 (±365)   | 857 (±305)*†  | 941 (±338)*†      |
| A1M (ug/ml)                          | 23.9 (±6.6)     | 24.9 (±8.1)   | 31.5 (±8.7)*† | 33.4 (±8.4)*†     |
| <i>Cord blood concentrations</i>     |                 |               |               |                   |
| Number of samples                    | 45              | 42            | 40            | 37                |
| Hemopexin (ug/ml)                    | 250 (±113)      | 176 (±103)*†  | 211 (±96)     | 133 (±100)*†      |
| A1M (ug/ml)                          | 17.9 (±4.2)     | 15.6 (±4.1)*† | 18.1 (±4.4)   | 15.6 (±3.8)*†     |

Data are mean (± standard deviation). A1M,  $\alpha$ 1-microglobulin; FGR, fetal growth restriction; PE, preeclampsia.

\*  $p < 0.05$  by student  $t$  or Mann Whitney U tests as appropriate, compared to controls (unadjusted).

†  $p < 0.05$  by multiple regression compared to controls, adjusted for chronic hypertension, diabetes, assisted reproductive technologies, smoking, fetal sex and gestational age at sampling.

**S2 Table. Concentrations of heme scavengers in maternal and fetal blood in preterm pregnancies.**

|                                      | <b>Controls</b> | <b>FGR</b>   | <b>PE</b>     | <b>PE&amp;FGR</b> |
|--------------------------------------|-----------------|--------------|---------------|-------------------|
| <i>Maternal blood concentrations</i> |                 |              |               |                   |
| Number of samples                    | 16              | 13           | 13            | 34                |
| Hemopexin (ug/ml)                    | 1120 (±289)     | 1083 (±321)  | 812 (±365)*†  | 913 (±322)*†      |
| A1M (ug/ml)                          | 21 (±5.6)       | 23.7 (±8.4)  | 31.7 (±9.6)*† | 34.3 (±9)*†       |
| <i>Cord blood concentrations</i>     |                 |              |               |                   |
| Number of samples                    | 13              | 8            | 12            | 23                |
| Hemopexin (ug/ml)                    | 258 (±123)      | 174 (±154)*† | 171 (±74)     | 99 (±81)*†        |
| A1M (ug/ml)                          | 19.7 (±4.8)     | 14.2 (±6)*†  | 17.6 (±4.6)   | 15.8 (±2.9)*†     |

Data are mean (± standard deviation). A1M,  $\alpha_1$ -microglobulin; FGR, fetal growth restriction; PE, preeclampsia.

\*  $p < 0.05$  by student  $t$  or Mann Whitney U tests as appropriate, compared to controls (unadjusted).

†  $p < 0.05$  by multiple regression compared to controls, adjusted for chronic hypertension, diabetes, assisted reproductive technologies, smoking and fetal sex.

**S3 Table. Concentrations of heme scavengers in maternal and fetal blood in term pregnancies.**

|                                      | <b>Controls</b> | <b>FGR</b>   | <b>PE</b>    | <b>PE&amp;FGR</b> |
|--------------------------------------|-----------------|--------------|--------------|-------------------|
| <i>Maternal blood concentrations</i> |                 |              |              |                   |
| Number of samples                    | 33              | 34           | 32           | 17                |
| Hemopexin (ug/ml)                    | 1081 (±242)     | 1034 (±384)  | 875 (±282)*† | 998 (±372)        |
| A1M (ug/ml)                          | 25.3 (±6.6)     | 25.4 (±8.1)  | 31.5 (±8.5)* | 31.5 (±6.8)*      |
| <i>Cord blood concentrations</i>     |                 |              |              |                   |
| Number of samples                    | 32              | 34           | 28           | 14                |
| Hemopexin (ug/ml)                    | 247 (±111)      | 177 (±90.4)* | 229 (±100)   | 189 (±105)        |
| A1M (ug/ml)                          | 17.1 (±3.7)     | 16 (±3.6)    | 18.4 (±4.4)  | 15.2 (±5)         |

Data are mean (± standard deviation). A1M,  $\alpha_1$ -microglobulin; FGR, fetal growth restriction; PE, preeclampsia.

\*  $p < 0.05$  by student  $t$  or Mann Whitney U tests as appropriate, compared to controls (unadjusted).

†  $p < 0.05$  by multiple regression compared to controls, adjusted for chronic hypertension, diabetes, assisted reproductive technologies, smoking and fetal sex.

**S4 Table. Concentrations of heme scavengers in maternal and fetal blood in pregnancies with a male fetus.**

|                                      | <b>Controls</b> | <b>FGR</b>  | <b>PE</b>     | <b>PE&amp;FGR</b> |
|--------------------------------------|-----------------|-------------|---------------|-------------------|
| <i>Maternal blood concentrations</i> |                 |             |               |                   |
| Number of samples                    | 26              | 25          | 17            | 31                |
| Hemopexin (ug/ml)                    | 1115 (±277)     | 1074 (±411) | 866 (±295)*†  | 956 (±343)        |
| A1M (ug/ml)                          | 23.9 (±7.3)     | 23.6 (±7.8) | 29.6 (±8.9)*† | 33.1 (±8.6)*†     |
| <i>Cord blood concentrations</i>     |                 |             |               |                   |
| Number of samples                    | 24              | 23          | 15            | 22                |
| Hemopexin (ug/ml)                    | 217 (±108)      | 162 (±105)  | 209 (±111)    | 113 (±101)*†      |
| A1M (ug/ml)                          | 17.2 (±4.4)     | 15.8 (±3.9) | 19.1 (±5.1)   | 15.8 (±3.3)       |

Data are mean (± standard deviation). A1M,  $\alpha_1$ -microglobulin; FGR, fetal growth restriction; PE, preeclampsia.

\*  $p < 0.05$  by student  $t$  or Mann Whitney U tests as appropriate, compared to controls (unadjusted).

†  $p < 0.05$  by multiple regression compared to controls, adjusted for chronic hypertension, diabetes, assisted reproductive technologies, smoking and gestational age at delivery.

**S5 Table. Concentrations of heme scavengers in maternal and fetal blood in pregnancies with a female fetus.**

|                                      | <b>Controls</b> | <b>FGR</b>    | <b>PE</b>     | <b>PE&amp;FGR</b> |
|--------------------------------------|-----------------|---------------|---------------|-------------------|
| <i>Maternal blood concentrations</i> |                 |               |               |                   |
| Number of samples                    | 23              | 22            | 28            | 20                |
| Hemopexin (ug/ml)                    | 1070 (±234)     | 1017 (±311)   | 852 (±317)*†  | 918 (±338)        |
| A1M (ug/ml)                          | 24 (±5.8)       | 26.4 (±8.4)   | 32.7 (±8.5)*† | 33.8 (±8.2)*†     |
| <i>Cord blood concentrations</i>     |                 |               |               |                   |
| Number of samples                    | 21              | 19            | 25            | 15                |
| Hemopexin (ug/ml)                    | 288 (±109)      | 193 (±100)*†  | 213 (±88.3)*  | 162 (±92.7)*†     |
| A1M (ug/ml)                          | 18.7 (±3.9)     | 15.4 (±4.5)*† | 17.6 (±3.9)   | 15.1 (±4.5)*†     |

Data are mean (± standard deviation). A1M,  $\alpha_1$ -microglobulin; FGR, fetal growth restriction; PE, preeclampsia.

\*  $p < 0.05$  by student  $t$  or Mann Whitney  $U$  tests as appropriate, compared to controls (unadjusted).

†  $p < 0.05$  by multiple regression compared to controls, adjusted for chronic hypertension, diabetes, assisted reproductive technologies, smoking and gestational age at sampling.

**S1 Fig. An example of the standard curve used to quantify a) maternal and b) fetal  $\alpha$ 1-microglobulin concentrations in unknown plasma samples.**

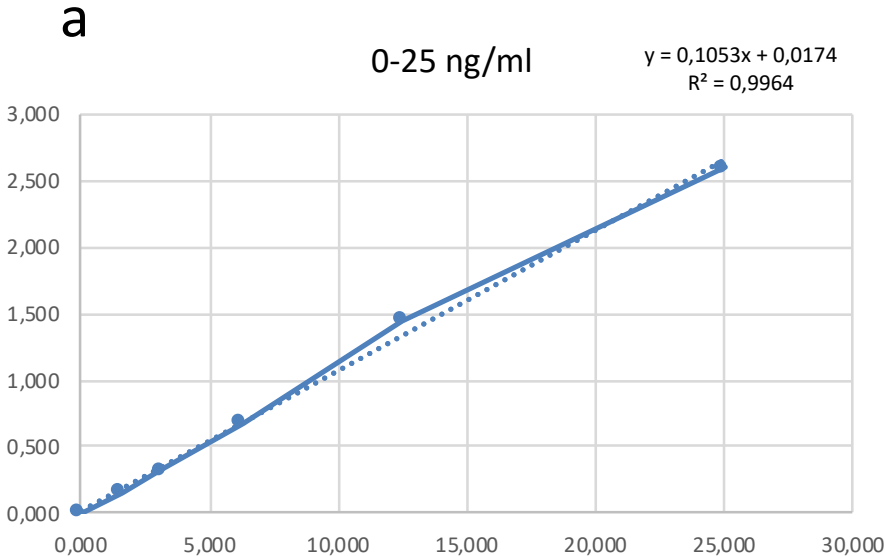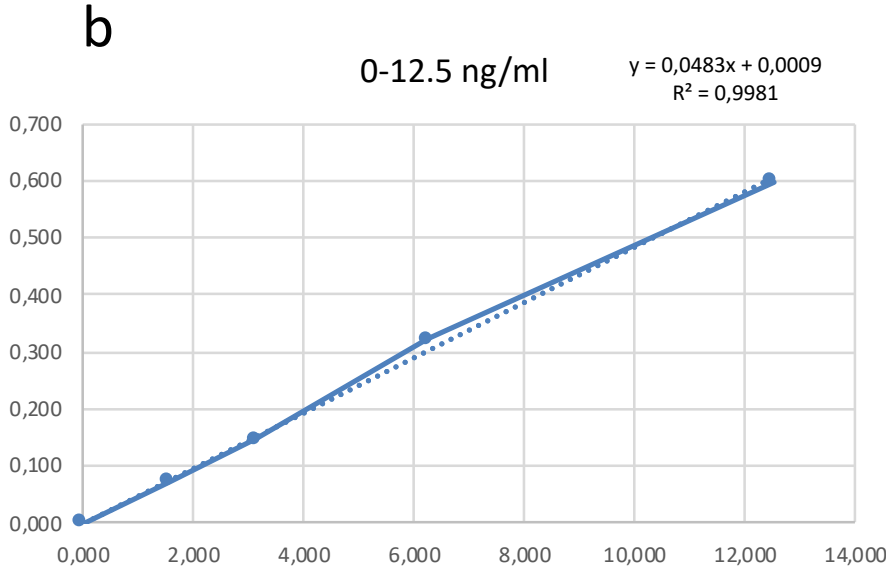

**S2 Fig. Pairwise correlation between maternal blood a) hemopexin or b)  $\alpha$ 1-microglobulin and serum creatinine concentrations in preeclamptic pregnancies.** Scatter and best fit line plots with Pearson correlation coefficient ( $r$ ) and level of significance. A1M,  $\alpha$ 1-microglobulin.

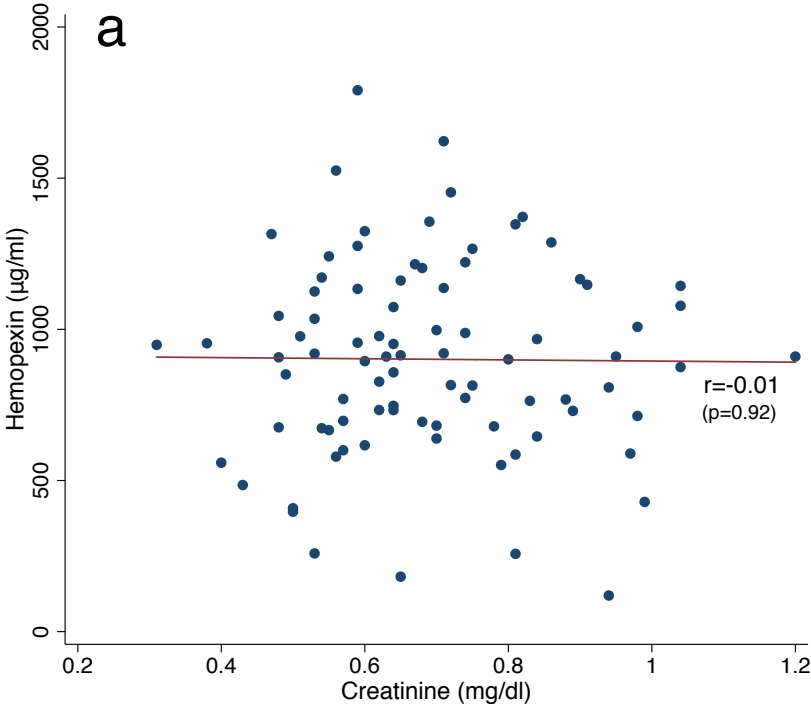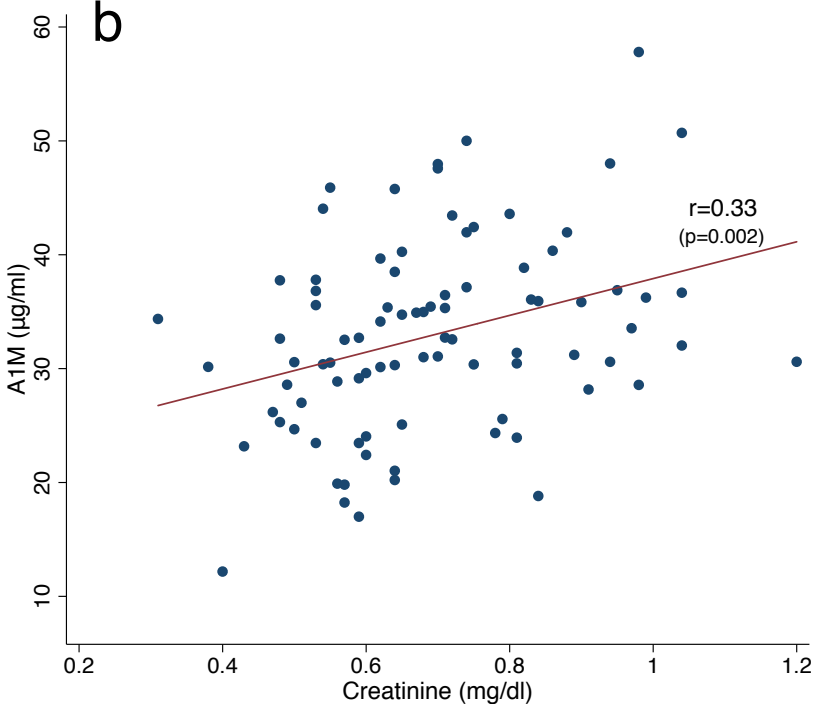



**S3 Fig. a) Free fetal hemoglobin, b) LDH activity and c) erythropoietin cord blood concentrations in the study population. Boxes show median and interquartile range, whiskers represent 1.5 X interquartile range or the extremes of the distribution. FGR, fetal growth restriction; PE, preeclampsia; HbF, fetal hemoglobin; LDH, lactate dehydrogenase.**

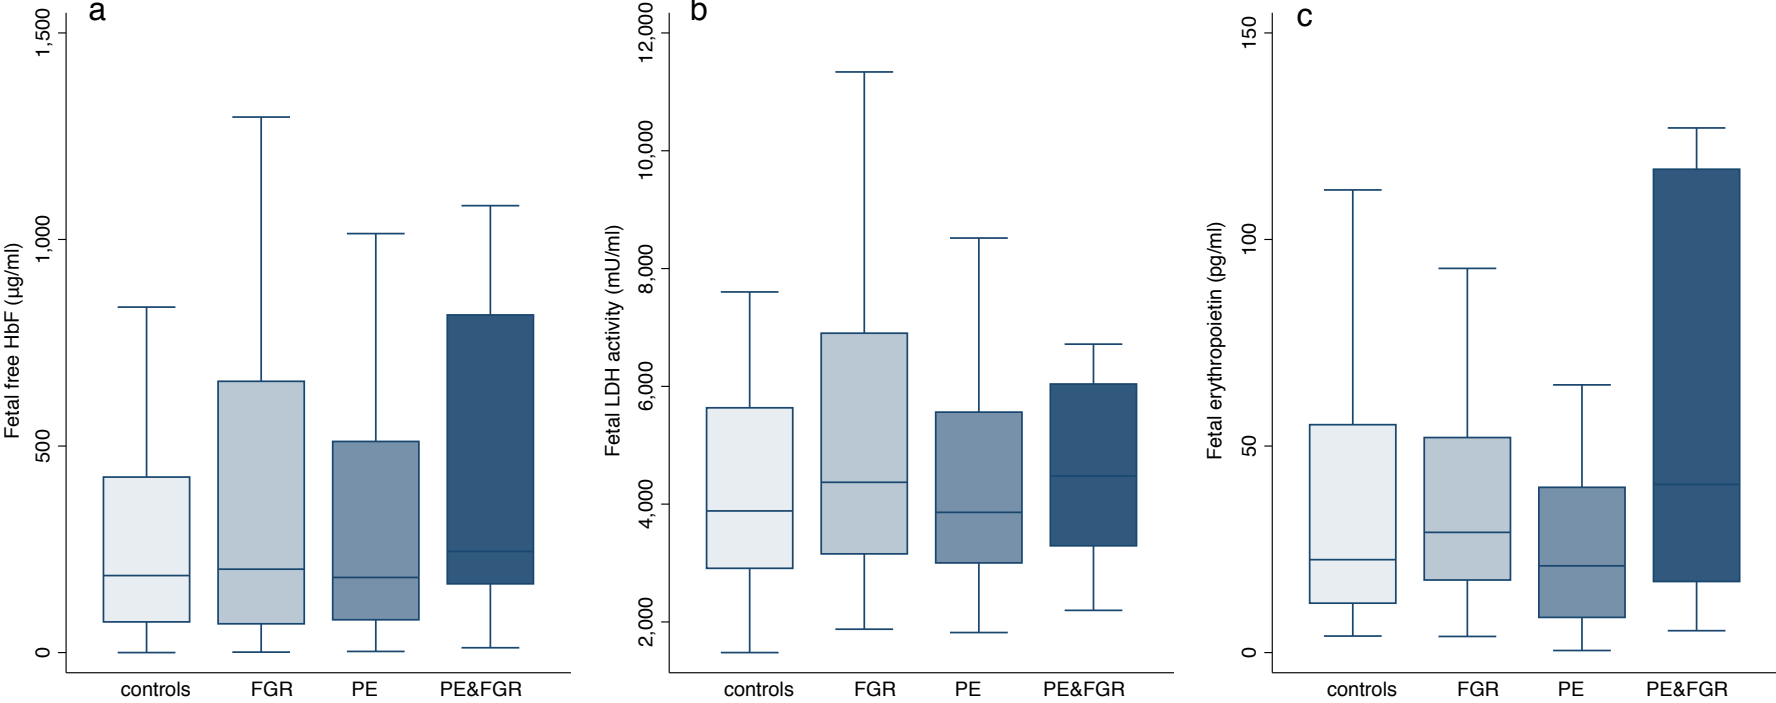

Supplement: pone.0239030.s001.pdf [file pone.0239030.s001.pdf]
